# Supplementary material
Source: Research Square preprint supplement (doi:10.21203/rs.3.rs-9125260/v1)
Supplement: Supplementary file 1 [file a85a49fe5f9bfcbd06d76c1e.docx]

| Table 1. Mean ± 95% confidence intervals (N) of the measured variables according to hatching age and illuminance group | | | |
| --- | --- | --- | --- |
|  | 30 days | 60 days | 90 days |
| Spherical equivalent (D) | | | |
| 10000 lux | 2.59 ± 0.52 (10) | 1.51 ± 0.12 (10) | 1.78 ± 0.32 (10) |
| 500 lux | 1.72 ± 0.22 (8) | 0.30 ± 0.64 (8) | 0.09 ± 0.54 (8) |
| 50 lux | 1.26 ± 0.51 (8) | –0.17 ± 0.81 (8) | –1.38 ± 0.79 (8) |
| Keratometry (D) | | | |
| 10000 lux | 82.57 ± 2.00 (9) | 69.30 ± 1.61 (9) | 65.66 ± 1.19 (9) |
| 500 lux | 78.90 ± 1.94 (9) | 66.33 ± 1.78 (9) | 62.92 ± 2.33 (9) |
| 50 lux | 77.47 ± 2.89 (7) | 67.16 ± 3.05 (7) | 62.38 ± 2.86 (7) |
| Anterior chamber depth (mm) | | | |
| 10000 lux | 1.28 ± 0.17 (15) | 2.05 ± 0.27 (15) | 2.17 ± 0.27 (15) |
| 500 lux | 1.41 ± 0.06 (10) | 2.26 ± 0.36 (10) | 2.56 ± 0.31 (10) |
| 50 lux | 1.50 ± 0.13 (10) | 2.28 ± 0.23 (10) | 2.93 ± 0.24 (10) |
| Lens thickness (mm) | | | |
| 10000 lux | 2.82 ± 0.18 (15) | 2.97 ± 0.24 (15) | 3.55 ± 0.17 (15) |
| 500 lux | 2.66 ± 0.14 (10) | 2.68 ± 0.12 (10) | 3.29 ± 0.21 (10) |
| 50 lux | 2.60 ± 0.12 (10) | 2.82 ± 0.19 (10) | 3.25 ± 0.25 (10) |
| Axial length (mm) | | | |
| 10000 lux | 10.84 ± 0.46 (15) | 12.65 ± 0.29 (15) | 13.93 ± 0.46 (15) |
| 500 lux | 11.13 ± 0.27 (9) | 13.13 ± 0.46 (9) | 14.82 ± 0.44 (9) |
| 50 lux | 11.07 ± 0.57 (10) | 13.24 ± 0.43 (10) | 14.80 ± 0.60 (10) |
| Lens power (D) | | | |
| 10000 lux | 69.91 ± 6.13 (8) | 66.52 ± 3.25 (8) | 56.00 ± 4.06 (8) |
| 500 lux | 66.37 ± 3.45 (5) | 63.31 ± 5.30 (5) | 50.64 ± 4.99 (5) |
| 50 lux | 67.18 ± 9.84 (4) | 57.74 ± 3.48 (4) | 57.00 ± 3.43 (4) |
| Corneal diameter (mm) | | | |
| 10000 lux | – | – | 8.96 ± 0.35 |
| 500 lux | – | – | 9.22 ± 0.24 |
| 50 lux | – | – | 9.39 ± 0.33 |
| Animal weight (grams) | | | |
| 10000 lux | 901 ± 61 | 2325 ± 141 | 3276 ± 203 |
| 500 lux | 903 ± 57 | 2348 ± 120 | 3351 ± 188 |
| 50 lux | 922 ± 54 | 2409 ± 134 | 3340 ± 175 |
